# Supplementary material for: Comparison of Machine Learning Performance Using Analytic and Holistic Coding Approaches Across Constructed Response Assessments Aligned to a Science Learning Progression
Source: Springer Nature journal article supplement (doi:10.1007/s10956-020-09858-0), 2020-09-26
Supplement: MOESM1 [file 18421814]

| **Online Resource 1** Rubric order for coders across four items in order to alternate rubric approach and item | | | | | | | | | | | |
| --- | --- | --- | --- | --- | --- | --- | --- | --- | --- | --- | --- |
| Item | APP1 | | NP1 | | | GR2 | | | RMP2 | | |
| Rubric | Holistic | Analytic | | Holistic | Analytic | | Holistic | Analytic | | Holistic | Analytic |
| Order of Coding | 2 | 5 | | 4 | 7 | | 6 | 1 | | 8 | 3 |
