# Supplementary material for: Comparison of Machine Learning Performance Using Analytic and Holistic Coding Approaches Across Constructed Response Assessments Aligned to a Science Learning Progression
Source: Springer Nature journal article supplement (doi:10.1007/s10956-020-09858-0), 2020-09-26
Supplement: MOESM2 [file 18421814]

**Online Resource 2** RMP2 Human-Human Inter-Rater Reliability confusion matrices for holistic and composite analytic coding

| H-H  Holistic | Coder 1 |  |  |  |  |  |
| --- | --- | --- | --- | --- | --- | --- |
| Coder 2 | 1 | 2 | 3 | 4 | 5 | SUM |
| 1 | 47 | 10 | 1 | 1 | 0 | 59 |
| 2 | 31 | 194 | 16 | 5 | 1 | 247 |
| 3 | 2 | 16 | 172 | 18 | 3 | 211 |
| 4 | 1 | 1 | 5 | 79 | 6 | 92 |
| 5 | 0 | 2 | 4 | 5 | 80 | 91 |
| SUM | 81 | 223 | 198 | 108 | 90 | 700 |

| H-H Composite Analytic | Coder 1 |  |  |  |  |  |
| --- | --- | --- | --- | --- | --- | --- |
| Coder 2 | 1 | 2 | 3 | 4 | 5 | SUM |
| 1 | 143 | 23 | 5 | 1 | 0 | 172 |
| 2 | 6 | 95 | 1 | 0 | 0 | 102 |
| 3 | 3 | 0 | 231 | 4 | 7 | 245 |
| 4 | 2 | 0 | 2 | 100 | 3 | 107 |
| 5 | 1 | 0 | 6 | 0 | 67 | 74 |
| SUM | 155 | 118 | 245 | 105 | 77 | 700 |
