# Supplementary material for: Comparison of Machine Learning Performance Using Analytic and Holistic Coding Approaches Across Constructed Response Assessments Aligned to a Science Learning Progression
Source: Springer Nature journal article supplement (doi:10.1007/s10956-020-09858-0), 2020-09-26
Supplement: MOESM3 [file 18421814]

**Online Resource 3** Human-Computer Inter-Rater Reliability confusion matrices comparing human consensus scores and Tool-c predictions for each item. Panel A: APP1; Panel B: NP1; Panel C: GR2; Panel D: RMP2.

**Panel A: APP1**

| HC  Holistic | Human Consensus |  |  |  |  |  |
| --- | --- | --- | --- | --- | --- | --- |
| Tool-c Prediction | 1 | 2 | 3 | 4 | 5 | SUM |
| 1 | 154 | 38 | 11 | 8 | 0 | 211 |
| 2 | 38 | 150 | 6 | 8 | 2 | 204 |
| 3 | 1 | 6 | 38 | 8 | 1 | 54 |
| 4 | 2 | 3 | 5 | 163 | 7 | 180 |
| 5 | 0 | 1 | 1 | 3 | 15 | 20 |
| SUM | 195 | 198 | 61 | 190 | 25 | 669 |

| HC Composite Analytic | Human Consensus |  |  |  |  |  |
| --- | --- | --- | --- | --- | --- | --- |
| Tool-c Prediction | 1 | 2 | 3 | 4 | 5 | SUM |
| 1 | 176 | 41 | 6 | 11 | 1 | 235 |
| 2 | 20 | 144 | 6 | 9 | 4 | 183 |
| 3 | 2 | 8 | 42 | 3 | 0 | 55 |
| 4 | 2 | 2 | 7 | 159 | 1 | 171 |
| 5 | 0 | 0 | 0 | 6 | 19 | 25 |
| SUM | 200 | 195 | 61 | 188 | 25 | 669 |

**Panel B: NP1**

| HC  Holistic | Human Consensus |  |  |  |  |  |
| --- | --- | --- | --- | --- | --- | --- |
| Tool-c Prediction | 1 | 2 | 3 | 4 | 5 | SUM |
| 1 | 19 | 8 | 0 | 0 | 0 | 27 |
| 2 | 22 | 206 | 29 | 5 | 1 | 263 |
| 3 | 4 | 13 | 183 | 41 | 6 | 247 |
| 4 | 0 | 0 | 13 | 106 | 25 | 144 |
| 5 | 0 | 0 | 1 | 4 | 14 | 19 |
| SUM | 45 | 227 | 226 | 156 | 46 | 700 |

| HC Composite Analytic | Human Consensus |  |  |  |  |  |
| --- | --- | --- | --- | --- | --- | --- |
| Tool-c Prediction | 1 | 2 | 3 | 4 | 5 | SUM |
| 1 | 27 | 16 | 2 | 0 | 0 | 45 |
| 2 | 14 | 198 | 41 | 3 | 0 | 256 |
| 3 | 4 | 12 | 173 | 43 | 3 | 235 |
| 4 | 0 | 1 | 10 | 107 | 21 | 139 |
| 5 | 0 | 0 | 0 | 3 | 22 | 25 |
| SUM | 45 | 227 | 226 | 156 | 46 | 700 |

**Panel C: GR2**

| HC  Holistic | Human Consensus |  |  |  |  |  |
| --- | --- | --- | --- | --- | --- | --- |
| Tool-c Prediction | 1 | 2 | 3 | 4 | 5 | SUM |
| 1 | 164 | 39 | 12 | 25 | 8 | 248 |
| 2 | 6 | 15 | 1 | 3 | 0 | 25 |
| 3 | 43 | 15 | 170 | 15 | 0 | 243 |
| 4 | 6 | 1 | 1 | 26 | 9 | 43 |
| 5 | 3 | 3 | 0 | 16 | 119 | 141 |
| SUM | 222 | 73 | 184 | 85 | 136 | 700 |

| HC Composite Analytic | Human Consensus |  |  |  |  |  |
| --- | --- | --- | --- | --- | --- | --- |
| Tool-c Prediction | 1 | 2 | 3 | 4 | 5 | SUM |
| 1 | 216 | 44 | 43 | 24 | 7 | 334 |
| 2 | 1 | 13 | 0 | 8 | 0 | 22 |
| 3 | 17 | 3 | 136 | 3 | 0 | 159 |
| 4 | 2 | 3 | 1 | 45 | 17 | 68 |
| 5 | 1 | 1 | 0 | 5 | 110 | 117 |
| SUM | 237 | 64 | 180 | 85 | 134 | 700 |

**Panel D: RMP2**

| HC  Holistic | Human Consensus |  |  |  |  |  |
| --- | --- | --- | --- | --- | --- | --- |
| Tool-c Prediction | 1 | 2 | 3 | 4 | 5 | SUM |
| 1 | 37 | 14 | 4 | 2 | 0 | 57 |
| 2 | 32 | 180 | 38 | 7 | 4 | 261 |
| 3 | 9 | 16 | 159 | 22 | 16 | 222 |
| 4 | 1 | 3 | 5 | 68 | 20 | 97 |
| 5 | 0 | 1 | 4 | 10 | 48 | 63 |
| SUM | 79 | 214 | 210 | 109 | 88 | 700 |

| HC Composite Analytic | Human Consensus |  |  |  |  |  |
| --- | --- | --- | --- | --- | --- | --- |
| Tool-c Prediction | 1 | 2 | 3 | 4 | 5 | SUM |
| 1 | 61 | 46 | 20 | 9 | 1 | 137 |
| 2 | 23 | 131 | 13 | 0 | 1 | 168 |
| 3 | 4 | 13 | 181 | 4 | 1 | 203 |
| 4 | 0 | 0 | 9 | 131 | 6 | 146 |
| 5 | 0 | 0 | 1 | 0 | 45 | 46 |
| SUM | 88 | 190 | 224 | 144 | 54 | 700 |
