# Supplementary material for: Comparison of Machine Learning Performance Using Analytic and Holistic Coding Approaches Across Constructed Response Assessments Aligned to a Science Learning Progression
Source: Springer Nature journal article supplement (doi:10.1007/s10956-020-09858-0), 2020-09-26
Supplement: MOESM4 [file 18421814]

| **Online Resource 4** Inter-Rater Reliability (QWK) for all IRRs and coding approaches | | | | | | | | |
| --- | --- | --- | --- | --- | --- | --- | --- | --- |
|  | Human-Human | |  | Human-Computer | |  | HH to HC Degradation | |
| Item | Holistic | Composite Analytic |  | Holistic | Composite Analytic |  | Holistic | Composite Analytic |
| APP1 | 0.911 | 0.892 |  | 0.786 | 0.804 |  | -0.125 | -0.088 |
| NP1 | 0.863 | 0.920 |  | 0.743 | 0.756 |  | -0.120 | -0.164 |
| GR2 | 0.882 | 0.818 |  | 0.685 | 0.724 |  | -0.197 | -0.094 |
| RMP2 | 0.830 | 0.905 |  | 0.693 | 0.779 |  | -0.137 | -0.126 |
