# Supplementary material for: Comparison of Machine Learning Performance Using Analytic and Holistic Coding Approaches Across Constructed Response Assessments Aligned to a Science Learning Progression
Source: Springer Nature journal article supplement (doi:10.1007/s10956-020-09858-0), 2020-09-26
Supplement: MOESM5 [file 18421814]

| **Online Resource 5** Time (per expert) required for deconstruction and full coding (calibration and independent coding) for each item (n=700 each) | | | | | | |
| --- | --- | --- | --- | --- | --- | --- |
|  |  | Holistic | |  | Composite Analytic | |
| Item | Deconstruction time per expert | Coding time required per expert | Time coding per 50 responses per expert |  | Coding time required per expert | Time coding per 50 responses per expert |
| APP1 | 6 h 53 m | 5 h 32 m | 23 m 40 s |  | 7 h 26 m | 31 m 48 s |
| NP1 | NA | 7 h 48 m | 33 m 3 s |  | 8 h 43 m | 37 m 23 s |
| GR2 | 9 h 19 m | 8 h 8 m | 34 m 49 s |  | 10 h 31 m | 45 m 0 s |
| RMP2 | 9 h 9 m | 8 h 32 m | 36 m 38 s |  | 12 h 45m | 54 m 41 s |
